# Supplementary material for: Biopharmaceutical Characteristics of Nifurtimox Tablets for Age‐ and Body Weight‐Adjusted Dosing in Patients With Chagas Disease
Source: PubMed Central journal article supplement (PMC8246722; doi:10.1002/cpdd.871), 2020-10-08

Figure S2

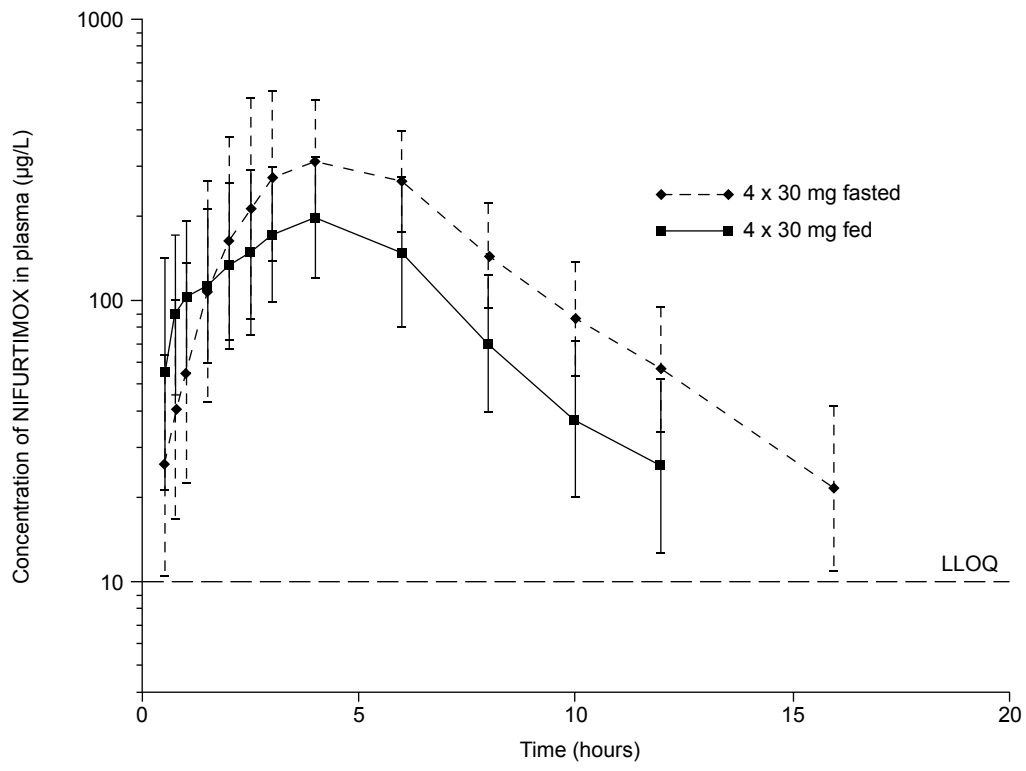

Supplement: CPDD-10-542-s002.pdf [file CPDD-10-542-s002.pdf]
